## 1 Article

# 2 Molecular dynamics simulations of zfP2X4 receptors

3 Kalyan Immadisetty<sup>1</sup> and Peter Huskey<sup>1,\*</sup>

4 <sup>1</sup>Stritch School of Medicine, Maywood IL 60153

5 \*Correspondence: pkekeneshuskey@luc.edu

6 **ABSTRACT** The ATP activated P2X4 receptor plays a prominent role in pain perception and modulation and thus may constitute  
7 an alternative therapeutic target for controlling pain. Given the biomedical relevance of P2X4 receptors, and poor understanding  
8 of molecular mechanisms that describe its gating by ATP, fundamental understanding of functional mechanism of these channels  
9 is warranted. Through classical all-atom molecular dynamics (MD) simulations we investigated the number of ATP molecules  
10 required to open (activate) the receptor for it to conduct ions. Since crystal structures of human P2X4 are not yet available, the  
11 crystal structures of highly-homologous zebrafish P2X4 (zfP2X4) structures were utilized for this study. It has been identified  
12 that at least two ATP molecules are required to prevent the open state receptor collapsing back to a closed state. Additionally,  
13 we have discovered two metal binding sites, one at the intersection of the three monomers in the ectodomain (MBS1) and the  
14 second one near the ATP binding site (MBS2), both of which are occupied by the potassium ions. This observation draws its  
15 comparison to the gulf coast P2X receptor that it possess the same two metal binding sites, however, MBS1 and MBS2 in this  
16 receptor are occupied by zinc and magnesium, respectively.

## 17 1 INTRODUCTION

18 Purinergic (P2X) receptors are ligand-gated cation channels that reside in the plasma membrane (1). P2X4 receptors are  
19 expressed in almost all mammalian tissues (2). P2X4 receptor is activated by adenosine triphosphate (ATP) (3–6), during which  
20 the channel opens and allows rapid flow of ions such as calcium (Ca<sup>2+</sup>), magnesium (Mg<sup>2+</sup>) and potassium (K<sup>+</sup>) (6). P2X4  
21 receptor exhibits high Ca<sup>2+</sup> permeability and contributes to depolarization of the cell membrane, whereby various Ca<sup>2+</sup> sensitive  
22 intracellular processes are triggered (6–8). P2X4 receptors are implicated in the regulation of cardiac function, ATP-mediated  
23 cell death, synaptic strengthening, activating of the inflammasome in response to injury and multiple sclerosis (5, 9–12). The  
24 P2X4 receptors are linked to neuropathic pain mediated by microglia (13, 14). Studies have found that P2X4 receptors are  
25 upregulated following injury (15). More importantly, P2X4 activation is both necessary and sufficient for neuropathic pain (16).

26 Despite their biomedical relevance, several structural (role of intracellular fragments and pore dilation) and functional  
27 aspects (activation mechanism, allosteric modulation by agonists such as ivermectin (IVM), the number of ATP needed to  
28 activate the channel, and desensitization) of P2X4 channels are still debated (17, 18). This makes it difficult to understand the  
29 extent to which P2X4 activation drives cellular responses and its potential druggability. A pressing limitation is the lack of  
30 human P2X4 crystal structures. However, zfP2X4 structures have been crystallized in multiple relevant conformations and in  
31 different functional states (19, 20). zfP2X4 shares ~59% sequence identity with human P2X4 (17) and has been shown to

32 form functional homomeric channels with properties comparable to mammalian orthologs (21). Hence, zfp2X4 structures are  
33 reasonable surrogates for modeling of the human variants of this channel.

34 P2X4 channels are trimeric (1) structures. zfp2X4 is a homotrimer (19, 22), with each subunit consisting of a transmembrane  
35 domain (TMD) and an extracellular ectodomain (Fig. 1). Each TMD contains two TM helices (TM1 and TM2). The TM2 of  
36 each sub unit together forms the TM pore that controls the gating of the channel (19, 22). ATP binds in an orthosteric binding  
37 site (Fig. 1) between the two neighboring subunits and facilitates a conformational transition i.e., from closed to open state,  
38 which was confirmed by the zfp2X4 crystal structures (19, 22). However, many details are still elusive including the number of  
39 ATP required to activate the channel and the role of ions in modulating the channel.

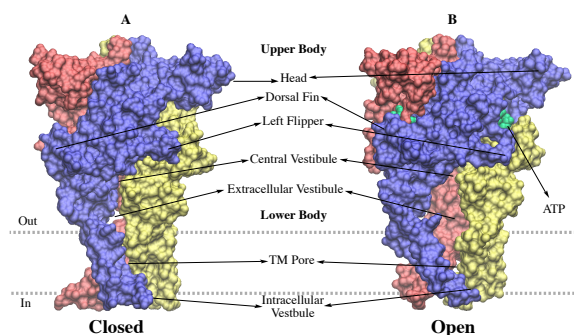

Figure 1: Closed (A) and open state (B) crystal structures of zfp2X4. The three isomers are colored blue, red and yellow, respectively. The closed structure is in apo form and ATP is binding in the open state structure between the isomers. ATP is shown in green. The TM pore, which is formed by the TM domain of each isomer, is the narrowest part of the channel. The TM pore is closed when deactivated and open when activated.

40 Ions play a critical role in normal functioning of many proteins (23–26). Divalent cations including zinc, magnesium,  
41 copper, cadmium, silver and mercury are reported to modulate the P2X receptors. For instance, it was demonstrated that zinc  
42 and copper modulate rat P2X4 receptors differently, i.e., zinc potentiates whereas copper inhibits ATP current (27, 28). Further,  
43 it was demonstrated via site directed mutagenesis the role of residue C132 in zinc potentiation (29), and residues D138 and  
44 H140 in copper inhibition in rat P2X4 receptors (29, 30). Similarly, it was reported that cadmium facilitates whereas mercury  
45 inhibits ATP mediated currents in rat P2X4 receptors (31). Also, it was hypothesized that there are at least three metal binding  
46 sites in P2X channels (31). Kasuya *et al.* reported an X-ray structure of Gulf Coast P2X receptor complexed with ATP and  
47 zinc ion (32). They have also reported two different metal binding sites, each for zinc and magnesium, respectively. Le *et al.*  
48 identified magnesium binding site near the ATP binding domain in the human P2X3 and demonstrated that magnesium enables  
49 ATP mediated activation of the channel. They have also proposed two different binding modes for magnesium in the presence  
50 and absence of ATP (33). The impact of divalent ions is not uniform among all P2X receptors. For example, it was proposed  
51 that magnesium does not have a role in P2X2 and P2X4, whereas in P2X1 and P2X3 it does coordinate ATP binding (34). As  
52 explained above monovalent ions including sodium and potassium are permeable through all seven P2X receptors. Studies have  
53 reported that monovalent ions potassium and sodium modulate the human P2X7 receptor-operated single channel currents (35).  
54 This study also reported a binding site for sodium on the extracellular side. One study demonstrated a modulatory role of  
55 protons in rat P2X7 (36).

56 MD simulations enable studying the structural and functional aspects of membrane proteins at an atomic level (24). The

57 P2X4 computational studies conducted thus far are either based on short nanosecond level unbiased MD simulations or  
58 enhanced MD simulations and were only successful in implicating either a part of a channel or a particular residue or interaction  
59 in activation (37–44), thus its gating dynamics remain unresolved. A complete rigorous atomic level description of the channel  
60 activation is warranted. Hence, using microsecond level equilibrium MD simulations we studied (a) the number of ATP  
61 required to activate the channel and (b) the binding sites of monovalent/divalent ions and their potential role in modulating the  
62 zfP2X4 channel. Based on  $\approx 13.5 \mu\text{s}$  of MD simulation data we show that minimum two ATP are required to activate zfP2X4.  
63 Additionally, we identified two metal binding sites in zfP2X4, similar to gulf coast P2X.

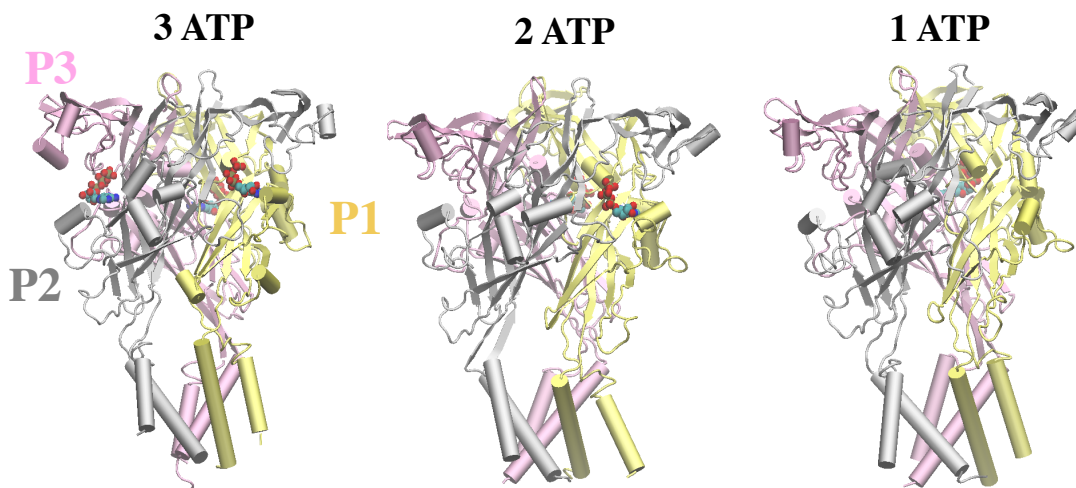

Figure 2: The three zfP2X4 structures studied. P1, P2 and P3 domains are colored yellow, grey and magenta, respectively. ATP molecules are shown as ball-and-stick representation. 1-ATP: ATP binds between P1 and P3 domains; 2-ATP: ATP binds between P1, P2 and P1, P3 domains. Side views of all three structures are shown.

## 64 2 METHODS

### 65 2.1 Molecular dynamics simulations

66 The open state crystal structure of zfP2X4 bound with three ATP molecules (PDB: 4DW1 (20)) was utilized for this study.  
67 Initially, the open state zfP2X4 crystal structure was downloaded from the crystal data bank and all waters were removed. The  
68 two and one ATP bound open state zfP2X4 systems were generated by deleting ATP from the three ATP bound crystal structure.  
69 All three systems were further processed and built for the MD simulation using the CHARMM-GUI web server (45, 46). Each  
70 system was placed in the POPC bilayer and solvated using the TIP3P water (47), and  $\text{K}^+$  and chloride ( $\text{Cl}^-$ ) ions were added to  
71 balance the charges as well as to attain a concentration of 0.15 M. Each system contains one P2X4 protein,  $\approx 42,425$  TIP3P water  
72 molecules,  $\approx 388$  POPC lipid molecules, 0.15 M KCl and 3/2/1 ATP molecules. The size of each system is  $\approx 155 \times 160 \times 170 \text{ \AA}^3$   
73 and the total number of atoms in each system is  $\approx 195,116$ . Amber force-field (ff12SB) (48) was used to treat the entire system.  
74 Each system was energy minimized for 100,000 steps using conjugate gradient algorithm (49), and further relaxed in a multistep  
75 procedure (which spans for  $\approx 1.5$  ns), wherein the lipid tails, protein side chains, and backbone were restrained and then released  
76 in a step wise manner as explained elsewhere (45) in the NVT ensemble. Further, production simulations were conducted under

77 periodic boundary conditions in NPT ensemble. Three replicas of each system were carried, each replica for  $\sim 1 \mu\text{s}$  ( $1\mu\text{s} \times 3$   
78 trials  $\times 3$  systems =  $9\mu\text{s}$ ). AMBER16 (50) was used for conducting the MD simulations. A 2 fs time step was used for the initial  
79 relaxation as well for the follow up production simulations. Temperature was maintained at 310 K using langevin thermostat  
80 and Nose-Hoover Langevin piston method was used to maintain a 1 atm pressure (51, 52). The non-bonded interactions were  
81 cut-off at 12 Å and the particle mesh Ewald (PME) method (53) was used to treat the long range electrostatics. Trajectories  
82 were saved every 20 ps. The SHAKE algorithm was used to constrain the hydrogen bonds (54).

83 In addition, all three systems described above are re-simulated (three replicas for each system) again but with the  $\text{Mg}^{2+}$  ions  
84 docked near the site of ATP binding as described in the references (32, 33). Please note that in the 2-ATP and 1-ATP systems  
85  $\text{Mg}^{2+}$  was only docked to the sites that contains ATP. An additional 2-ATP and 1-ATP system were generated but with  $\text{Mg}^{2+}$   
86 docked in all three domains irrespective of presence of ATP molecules. Overall, five  $\text{Mg}^{2+}$  docked open state zfp2X4 systems  
87 were modeled for MD simulations; a 3-ATP system with  $\text{Mg}^{2+}$  found at each docking site, two 2-ATP systems, and two 1-ATP  
88 systems. The 2-ATP and 1-ATP had one system each with  $\text{Mg}^{2+}$  docked in all three domains and one system each where  $\text{Mg}^{2+}$   
89 only docked in domains where ATP is present. All simulations were conducted on a local GPU cluster.

90 Data analysis was conducted using VMD and its various plugins (55) and five data points per each ns was used for analysis.  
91 Simulation input files and generated data are available upon request.

### 92 **3 RESULTS AND DISCUSSION**

93 To study the ATP activation of P2X4, three open state P2X4 systems, each docked with three (3-ATP), two (2-ATP) and one  
94 ATP (1-ATP) molecules were simulated via unbiased MD simulations. An open state zfp2X4 crystal structure bound with three  
95 ATP (56) was utilized as a starting structure for this study. All three systems reached an apparent steady state at around 4 Å  
96 after 700 ns as evidenced by the backbone RMSDs (Fig. S1J). The backbone RMSD of the TMDs that form the TM pore were  
97 stabilized after 700 ns (Fig. S1 D-I) as well in all three systems ( $\approx 5\text{-}6$  Å).

#### 98 **3.1 Two ATP molecules are atleast required to activate the zfp2X4**

99 P2X receptors are activated by ATP facilitating the channel opening and transporting of the cations including  $\text{K}^+$ , sodium  
100 ( $\text{Na}^+$ ) and  $\text{Ca}^{2+}$  across the biological membrane. ATP binds in the ectodomain and facilitate opening of the narrowest part of  
101 the channel (TM pore) formed by the TMD. P2X receptors are trimeric (homo/hetero) and are capable of binding three ATP  
102 molecules in the ectodomain (56). However, the minimum number of ATP required to activate the P2X receptors is still debated,  
103 particularly the P2X4s. Therefore, to study this aspect in detail we simulated three zfp2X4 open state receptors each docked  
104 with one, two and three ATP molecules, respectively. Since the activation of the channel opens the TM pore, we measured the  
105 pore radius as a function of the simulation time Fig. S2. Pore radius was estimated as the distance of  $\text{C}_\alpha$  of L316 to the center  
106 of the TM pore. L316 was reported as the narrowest part of the TM pore (Fig. 3) (56). The TM pore of the 1-ATP system  
107 collapsed immediately (within the first 5 ns), where as the 2- & 3-ATP systems resisted the pore collapse hinting that at-least  
108 2-ATP are required to activate the zfp2X4 channel. The average pore radius in the case of 1-ATP system was  $\approx 3.8$  Å (Fig. 3),  
109 where as in the case 2- and 3-ATP systems it was always  $\geq 5.8$  Å (Fig. 3), except for one 3-ATP trail (Fig. S2). Note that the

110 open zfP2X4 channel was used a starting system for all these simulations.

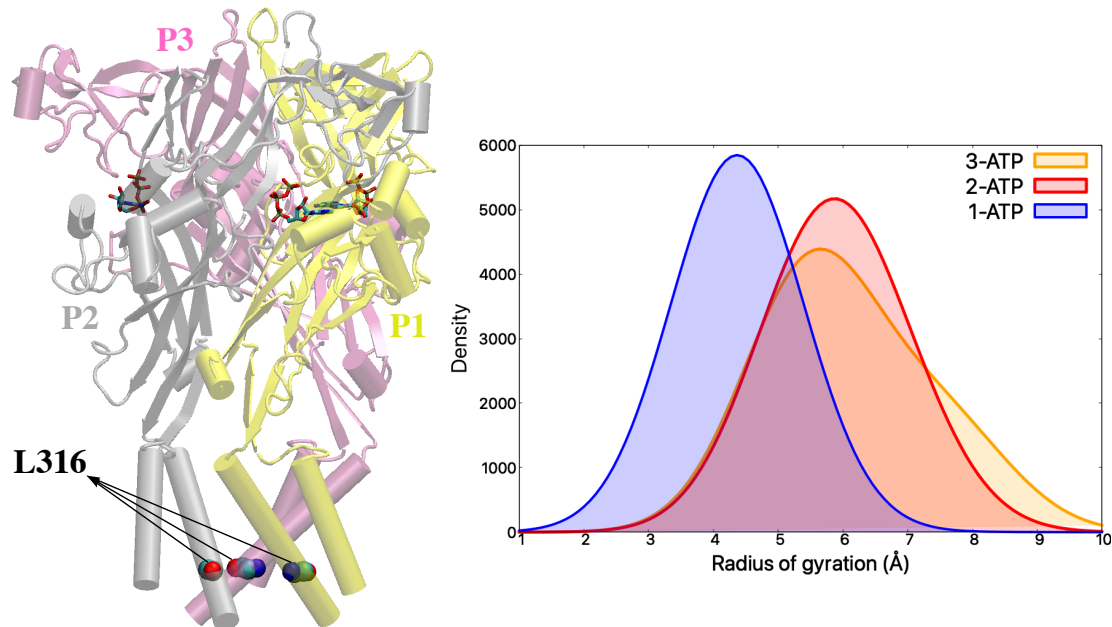

Figure 3: Density plot of radius of gyration ( $R_g$ ). 1-ATP, 2-ATP and 3-ATP systems are colored blue, red and orange, respectively. L316 of the three isomers were used for the calculation of radius of gyration ( $R_g$ )(shown in left panel). Only  $C_\alpha$  atoms of L316 were considered. The outliers were not considered for plotting the densities for clarity purpose .

### 111 3.2 Two metal binding sites were identified in zfP2X4

112 Ions are key for normal functioning of various proteins/receptors in humans. Particularly in P2X receptors, a range of cations  
113 bind and modulate their structure, dynamics and function. Studies have reported that divalent cations such as magnesium, zinc,  
114 copper and cadmium modulate P2X receptors (27, 28, 31–34). Studies have also identified the role of external monovalent  
115 cations in modulating P2X7 receptors, particularly potassium and sodium (35). A sodium binding site has also been identified  
116 in P2X7 in the same study. Given their importance, the role of cations have been investigated in this study in zfP2X4. We  
117 have identified two metal binding sites in the zfP2X4, similar to what was observed in the gulf coast P2X (32). The first metal  
118 binding site (MBS1) was identified at the intersection of three isomers in the upper part of the ectodomain (Fig. 4C).  $K^+$  ions  
119 were found binding in the MBS1 and coordinating the three isomers via interacting with the polar (such as S101 and Y99) and  
120 negatively charged (such as E98, D99 and D323) residues of the protein (Fig. 4C,D). Further, the number of  $K^+$  binding in the  
121 MBS1 (i.e., the number of  $K^+$  ions that are within 8 Å of all three isomers in the vestibule) as a function of simulation time  
122 were estimated. On average two to three  $K^+$  ions were consistently present in MBS1 in the 3-ATP and 2-ATP systems, whereas  
123 in the 1-ATP system they reduced from three to one with time (Fig. 5A). We hypothesize that this is due to the collapse of the  
124 channel in the 1-ATP system, thus collapsing MBS1. This supports our claim that atleast two ATP are required to activate the  
125 channel (or to keep the TM pore open). Earlier studies reported that zinc ( $Zn^{2+}$ ) binding in the MBS1 potentiates ATP mediated  
126 currents in the gulf coast P2X channel through allostery (32). In the MBS1 residues that interact with the potassium ions are

127 E98, D99, Y99, S101 and D323. This is a highly conserved site across the P2X4 receptors and residues that are interacting with  
128 the zfp2X4 are similar to other P2X receptors (32).

129 The second metal binding site (MBS2) was identified near the ATP binding sites, which were present at the intersection  
130 of two neighboring isomers in the ectodomain (Fig. 4A). Several reports suggested that MBS2 was occupied by the  $Mg^{2+}$   
131 ions (32, 33), coordinating the binding of ATP to the P2X2 and p2X4 receptors. In this study we have identified that  $K^+$  ions  
132 were occupying the MBS2 and interacting with the ATP (Fig. 4A). Further, we estimated that atleast one  $K^+$  ion was binding in  
133 the MBS2 (Fig. 5B-D). Additionally, we identified correlation between ATP binding to the channel and  $K^+$  ions binding to the  
134 MBS2, i.e., when no ATP binds in a ATP binding site no  $K^+$  ions binds to the respective MBS2, and vice versa. For instance, in  
135 the 3-ATP system, three ATP molecules binds to the three ATP binding sites and subsequently we observed  $K^+$  ions binding  
136 to all three MBS2s. However, in the case of 2-ATP system  $K^+$  ions were binding near the two ATP binding sites that were  
137 occupied by ATP but not near the ATP binding site that was not occupied with ATP (i.e., site between domains P2 and P3)  
138 (Fig. 5 B-D). Similarly in the 1-ATP system,  $K^+$  was binding in the MBS2 adjacent to the site occupied with ATP (i.e., between  
139 the domains P1 and P3) and absent in the other two MBS2 sites. This is in contrast to the hP2X3, in which  $Mg^{2+}$  ions binds to  
140 all three MBS2s irrespective of ATP binding to the ATP binding sites (33). In the MBS2, residues primarily interacting with  
141 the  $K^+$  ions were D145 and E171 (Fig. 4B). This is similar to others including gulf coast P2X (32) and hP2X3 (33).

142 It has been reported that ions binding to the MBS2 in different P2X receptors have diversified roles. For instance, magnesium  
143 binding to the MBS2 modulates the ATP mediated gating of P2X2 and P2X4 but not in P2X1 and P2X3 (32). Similarly, it was  
144 demonstrated that zinc binding to this site do not show potentiation of ATP mediated currents in gulf coast P2X (32). Further  
145 studies are required to establish the functional role of various ions binding to these two metal binding sites in zfp2X4, including  
146 the significance of various residues.

#### 147 **4 CONCLUSION**

148 zfp2X4 is a homologue of human P2X4 and thus could provide critical insights into the P2X4-dependent progression of  
149 neuropathic pain. In this report we studied via MD simulations the activation of zfp2X4 by ATP and show that atleast two ATP  
150 molecules are required to activate the zfp2X4. We also identified two metal binding sites in the zfp2X4 similar to other P2X  
151 receptors such as gulf coast P2X. The first metal binding site is located at the intersection of three isomers in the upper part of  
152 the vestibule and the second metal binding site is located near the ATP binding site. We have identified  $K^+$  ions binding to  
153 both the metal binding sites. The first metal binding site is dominantly occupied with negatively charged and polar residues  
154 thereby facilitating the binding of metal cations.  $K^+$  ions binding in the second binding site is coordinating the binding of  
155 ATP with the receptor. Further studies are required to understand the role of ions binding to these two binding sites given the  
156 divergent role of different ions at different P2X receptors. The information gained from this study will help design strategies  
157 aimed at manipulating P2X receptors via small molecule modulators to treat diseases such as multiple sclerosis, neuropathic  
158 pain, thrombus, and rheumatoid arthritis (18).



## 159 **5 AUTHOR CONTRIBUTIONS**

160 KI conducted simulations, analyzed the data and wrote the manuscript. PKH designed the project and wrote the manuscript.

## 161 **6 ACKNOWLEDGMENTS**

162 Research reported in this publication was supported by the Maximizing Investigators' Research Award (MIRA) (R35) from  
163 the National Institute of General Medical Sciences (NIGMS) of the National Institutes of Health (NIH) under grant number  
164 R35GM124977. This work used the Extreme Science and Engineering Discovery Environment (XSEDE) (57), which is  
165 supported by National Science Foundation grant number ACI-1548562.

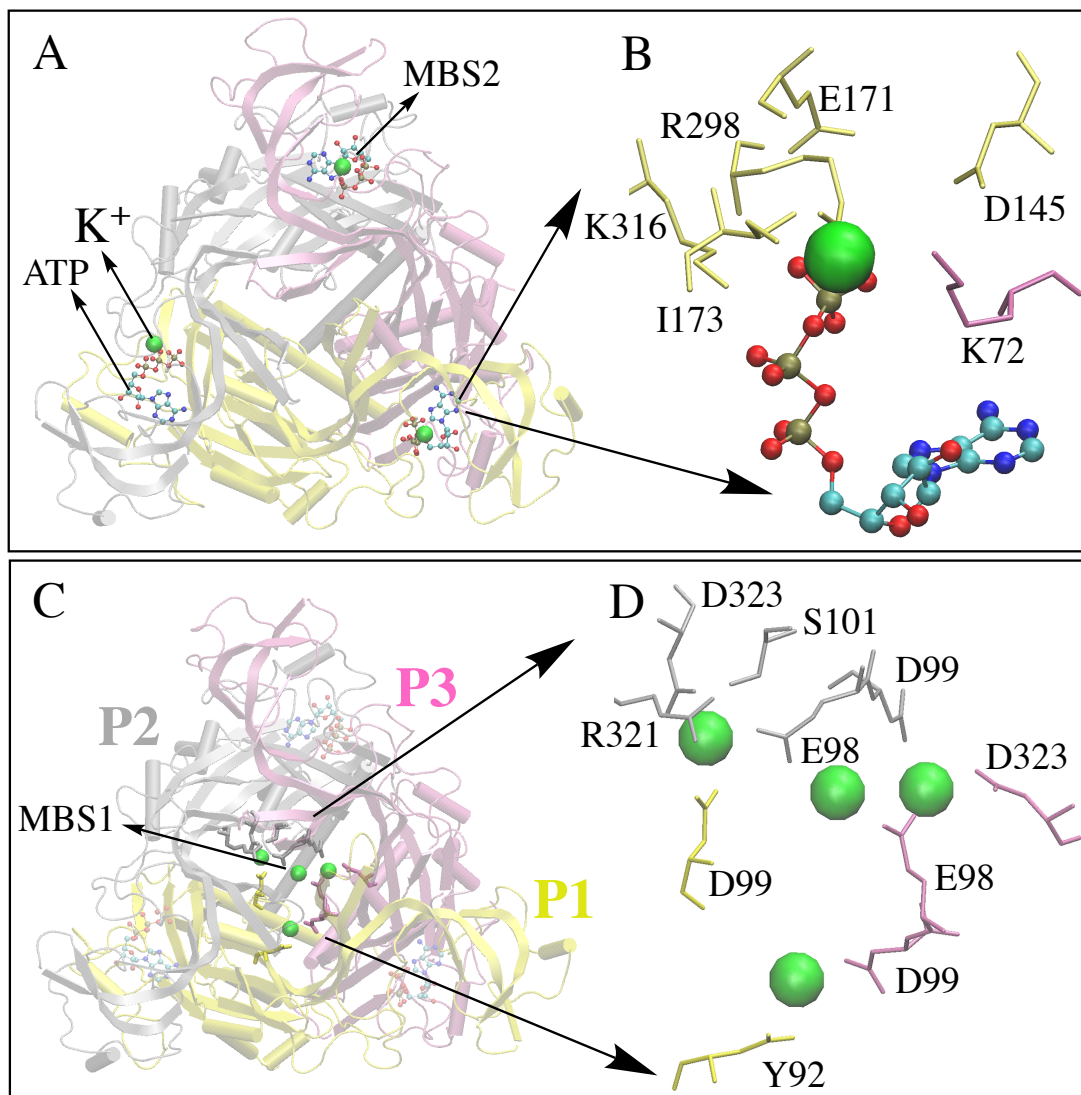

Figure 4: Metal binding sites 1 & 2 in the zfP2X4 (3-ATP system). **A** K<sup>+</sup> within 5 Å of ATP and 5 Å of protein in the metal binding site 2 (MBS2) are shown. P1, P2 and P3 are the individual isomers and are colored yellow, grey and magenta, respectively. **B** MBS2 between P1 and P3 shown in close-up. Green spheres are K<sup>+</sup> ions. ATP are shown as ball stick models. Residues within 5 Å of ions are shown. Residues are colored according to the respective domains they belong. **C** K<sup>+</sup> ions binding in the metal binding site 1 (MBS1) coordinating the three isomers inside the vestibule. Ions within 8 Å of all three isomers inside the vestibule are considered. **D** MBS1 close-up view. Top view of protein is shown in both A and C.

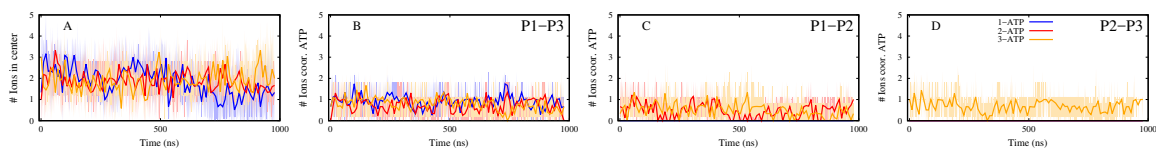

Figure 5: **A** Average number of K<sup>+</sup> ions binding in the MBS1 located at the intersection of three isomers in the vestibule. Ions within 8 Å of all three isomers inside the vestibule are shown. **B-D** Average number of K<sup>+</sup> ions binding in the MBS2s located between the isomers P1,P3 (B), P1,P2 (C) and P2,P3 (D). Ions within 5 Å of both the ATP and protein are estimated. 1-, 2-, and 3-ATP systems are colored blue, red and orange, respectively. Average and standard of the three MD trials are shown.



## 166 BIBLIOGRAPHY

- 167 1. Kaczmarek-Hájek, K., É. Lörinczi, R. Hausmann, and A. Nicke, 2012. Molecular and functional properties of P2X  
168 receptors—recent progress and persisting challenges. *Purinergic signalling* 8:375–417. **1**
- 169 2. Bo, X., M. Kim, S. L. Nori, R. Schoepfer, G. Burnstock, and R. A. North, 2003. Tissue distribution of P2X 4 receptors  
170 studied with an ectodomain antibody. *Cell and tissue research* 313:159–165. **1**
- 171 3. Rothwell, S. W., P. J. Stansfeld, L. Bragg, A. Verkhratsky, and R. A. North, 2014. Direct Gating of ATP-activated Ion  
172 Channels (P2X2 Receptors) by Lipophilic Attachment at the Outer End of the Second Transmembrane Domain. *Journal of*  
173 *Biological Chemistry* . **1**
- 174 4. Khadra, A., Z. Yan, C. Coddou, M. Tomic, A. Sherman, and S. S. Stojilkovic, 2012. Gating properties of the P2X2a and  
175 P2X2b receptor channels: Experiments and mathematical modeling. *The Journal of general physiology* 139:333–348.
- 176 5. Shen, J.-B., 2006. Extracellular ATP-stimulated current in wild-type and P2X4 receptor transgenic mouse ventricular  
177 myocytes: implications for a cardiac physiologic role of P2X4 receptors. *The FASEB Journal* 20:277–284. **1**
- 178 6. North, R. A., 2002. Molecular Physiology of P2X Receptors. *Physiological Reviews* 82:1013–1067. **1**
- 179 7. Shigetomi, E., and F. Kato, 2004. Action potential-independent release of glutamate by Ca<sup>2+</sup> entry through presynaptic  
180 P2X receptors elicits postsynaptic firing in the brainstem autonomic network. *Journal of Neuroscience* 24:3125–3135.
- 181 8. Koshimizu, T.-a., F. Van Goor, M. Tomić, A. O.-L. Wong, A. Tanoue, G. Tsujimoto, and S. S. Stojilkovic, 2000.  
182 Characterization of calcium signaling by purinergic receptor-channels expressed in excitable cells. *Molecular pharmacology*  
183 58:936–945. **1**
- 184 9. Solini, A., E. Santini, D. Chimenti, P. Chiozzi, F. Pratesi, S. Cuccato, S. Falzoni, R. Lupi, E. Ferrannini, G. Pugliese, et al.,  
185 2007. Multiple P2X receptors are involved in the modulation of apoptosis in human mesangial cells: evidence for a role of  
186 P2X4. *American Journal of Physiology-Renal Physiology* 292:F1537–F1547. **1**
- 187 10. Baxter, A. W., S. J. Choi, J. A. Sim, and R. A. North, 2011. Role of P2X4 receptors in synaptic strengthening in mouse  
188 CA1 hippocampal neurons. *European Journal of Neuroscience* 34:213–220.
- 189 11. Kawano, A., M. Tsukimoto, T. Noguchi, N. Hotta, H. Harada, T. Takenouchi, H. Kitani, and S. Kojima, 2012. Involvement  
190 of P2X4 receptor in P2X7 receptor-dependent cell death of mouse macrophages. *Biochemical and biophysical research*  
191 *communications* 419:374–380.
- 192 12. Sadovnick, A. D., B. J. Gu, A. L. Traboulsee, C. Q. Bernales, M. Encarnacion, I. M. Yee, M. G. Criscuoli, X. Huang,  
193 A. Ou, C. J. Milligan, et al., 2017. Purinergic receptors P2RX4 and P2RX7 in familial multiple sclerosis. *Human mutation*  
194 38:736–744. **1**
- 195 13. Ulmann, L., H. Hirbec, and F. Rassendren, 2010. P2X4 receptors mediate PGE<sub>2</sub> release by tissue-resident macrophages  
196 and initiate inflammatory pain. *The EMBO journal* 29:2290–2300. **1**

- 197 14. Tsuda, M., K. Kuboyama, T. Inoue, K. Nagata, H. Tozaki-Saitoh, and K. Inoue, 2009. Behavioral phenotypes of mice  
198 lacking purinergic P2X 4 receptors in acute and chronic pain assays. *Molecular pain* 5:28. 1
- 199 15. Ulmann, L., J. P. Hatcher, J. P. Hughes, S. Chaumont, P. J. Green, F. Conquet, G. N. Buell, A. J. Reeve, I. P. Chessell, and  
200 F. Rassendren, 2008. Up-regulation of P2X4 receptors in spinal microglia after peripheral nerve injury mediates BDNF  
201 release and neuropathic pain. *Journal of Neuroscience* 28:11263–11268. 1
- 202 16. Tsuda, M., Y. Shigemoto-Mogami, S. Koizumi, A. Mizokoshi, S. Kohsaka, M. W. Salter, and K. Inoue, 2003. P2X 4  
203 receptors induced in spinal microglia gate tactile allodynia after nerve injury. *Nature* 424:778. 1
- 204 17. Grimes, L., and M. T. Young, 2015. Purinergic P2X receptors: structural and functional features depicted by X-ray and  
205 molecular modelling studies. *Current medicinal chemistry* 22:783–98. 1
- 206 18. Wang, J., and Y. Yu, 2016. Insights into the channel gating of P2X receptors from structures, dynamics and small molecules.  
207 *Acta Pharmacologica Sinica* 37:44–55. 1, 4
- 208 19. Kawate, T., J. C. Michel, W. T. Birdsong, and E. Gouaux, 2009. Crystal structure of the ATP-gated P2X 4 ion channel in  
209 the closed state. *Nature* 460:592. 1
- 210 20. Hattori, M., and E. Gouaux, 2012. Molecular mechanism of ATP binding and ion channel activation in P2X receptors.  
211 *Nature* . 1, 2.1
- 212 21. Diaz-Hernandez, M., J. A. Cox, K. Migita, W. Haines, T. M. Egan, and M. M. Voigt, 2002. Cloning and characterization of  
213 two novel zebrafish P2X receptor subunits. *Biochemical and biophysical research communications* 295:849–853. 1
- 214 22. Hato, Z., D. Boda, and T. Kristof, 2012. Simulation of steady-state diffusion: Driving force ensured by dual control volumes  
215 or local equilibrium Monte Carlo. *The Journal of chemical physics* 137:54109. 1
- 216 23. van de Locht, M., S. Donkervoort, J. M. de Winter, S. Conijn, L. Begthel, B. Kusters, P. Mohassel, Y. Hu, L. Medne,  
217 C. Quinn, S. A. Moore, R. Foley, G. Seo, D. T. Hwee, F. I. Malik, T. Irving, W. Ma, H. Granzier, E.-J. Kamsteeg,  
218 K. Immadisetty, P. Kekenes-Huskey, J. R. Pinto, N. Voermans, C. G. Bönnemann, and C. A. Ottenheijm, 2021. Pathogenic  
219 variants in TNNC2 cause congenital myopathy due to an impaired force response to calcium. *The Journal of Clinical*  
220 *Investigation* . 1
- 221 24. Immadisetty, K., and J. D Madura, 2013. A review of monoamine transporter-ligand interactions. *Current Computer aided*  
222 *drug design* 9:556–568. 1
- 223 25. Immadisetty, K., and M. Moradi, 2020. Mechanistic picture for chemo-mechanical couplings in a bacterial proton-coupled  
224 oligopeptide transporter from *Streptococcus thermophilus*. *bioRxiv* .
- 225 26. Immadisetty, K., B. Sun, and P. Kekenes-Huskey, 2020. Structural determinants of calcium binding beyond the EF-hand  
226 binding site: a study of alpha parvalbumins. *bioRxiv* . 1
- 227 27. Acuña-Castillo, C., B. Morales, and J. P. Huidobro-Toro, 2000. Zinc and copper modulate differentially the P2X4 receptor.  
228 *Journal of neurochemistry* 74:1529–1537. 1, 3.2

- 229 28. Coddou, C., B. Morales, and J. P. Huidobro-Toro, 2003. Neuromodulator role of zinc and copper during prolonged ATP  
230 applications to P2X4 purinoceptors. *European journal of pharmacology* 472:49–56. **1, 3.2**
- 231 29. Coddou, C., C. Acuña-Castillo, P. Bull, and J. P. Huidobro-Toro, 2007. Dissecting the facilitator and inhibitor allosteric  
232 metal sites of the P2X4 receptor channel: critical roles of CYS132 for zinc potentiation and ASP138 for copper inhibition.  
233 *Journal of Biological Chemistry* 282:36879–36886. **1**
- 234 30. Coddou, C., B. Morales, J. González, M. Grauso, F. Gordillo, P. Bull, F. Rassendren, and J. P. Huidobro-Toro, 2003.  
235 Histidine 140 plays a key role in the inhibitory modulation of the P2X4 nucleotide receptor by copper but not zinc. *Journal*  
236 *of Biological Chemistry* 278:36777–36785. **1**
- 237 31. Coddou, C., R. A. Lorca, C. Acuña-Castillo, M. Grauso, F. Rassendren, and J. P. Huidobro-Toro, 2005. Heavy metals  
238 modulate the activity of the purinergic P2X4 receptor. *Toxicology and applied pharmacology* 202:121–131. **1, 3.2**
- 239 32. Kasuya, G., Y. Fujiwara, M. Takemoto, N. Dohmae, Y. Nakada-Nakura, R. Ishitani, M. Hattori, and O. Nureki, 2016.  
240 Structural Insights into Divalent Cation Modulations of ATP-Gated P2X Receptor Channels. *Cell Reports* 14:932–944. **1,**  
241 **2.1, 3.2**
- 242 33. Li, M., Y. Wang, R. Banerjee, F. Marinelli, S. Silberberg, J. D. Faraldo-Gómez, M. Hattori, and K. J. Swartz, 2019.  
243 Molecular mechanisms of human P2X3 receptor channel activation and modulation by divalent cation bound ATP. *eLife*  
244 8:e47060. **1, 2.1, 3.2**
- 245 34. Chataigneau, T., D. Lemoine, and T. Grutter, 2013. Exploring the ATP-binding site of P2X receptors. *Frontiers in cellular*  
246 *neuroscience* 7:273. **1, 3.2**
- 247 35. Riedel, T., G. Schmalzing, and F. Markwardt, 2007. Influence of extracellular monovalent cations on pore and gating  
248 properties of P2X7 receptor-operated single-channel currents. *Biophysical journal* 93:846–858. **1, 3.2**
- 249 36. Acuña-Castillo, C., C. Coddou, P. Bull, J. Brito, and J. P. Huidobro-Toro, 2007. Differential role of extracellular histidines  
250 in copper, zinc, magnesium and proton modulation of the P2X7 purinergic receptor. *Journal of neurochemistry* 101:17–26.  
251 **1**
- 252 37. Du, J., H. Dong, and H.-X. Zhou, 2012. Gating mechanism of a P2X4 receptor developed from normal mode analysis and  
253 molecular dynamics simulations. *Proceedings of the National Academy of Sciences* 109:4140–4145. **1**
- 254 38. Heymann, G., J. Dai, M. Li, S. D. Silberberg, H.-X. Zhou, and K. J. Swartz, 2013. Inter-and intrasubunit interactions  
255 between transmembrane helices in the open state of P2X receptor channels. *Proceedings of the National Academy of*  
256 *Sciences* 110:E4045–E4054.
- 257 39. Zhao, W.-S., J. Wang, X.-J. Ma, Y. Yang, Y. Liu, L.-D. Huang, Y.-Z. Fan, X.-Y. Cheng, H.-Z. Chen, R. Wang, et al., 2014.  
258 Relative motions between left flipper and dorsal fin domains favour P2X4 receptor activation. *Nature communications*  
259 5:4189.

- 260 40. Turchenkov, D. A., and V. S. Bystrov, 2014. Conductance simulation of the purinergic P2X2, P2X4, and P2X7 ionic  
261 channels using a combined brownian dynamics and molecular dynamics approach. *The Journal of Physical Chemistry B*  
262 118:9119–9127.
- 263 41. Huang, L.-D., Y.-Z. Fan, Y. Tian, Y. Yang, Y. Liu, J. Wang, W.-S. Zhao, W.-C. Zhou, X.-Y. Cheng, P. Cao, et al., 2014.  
264 Inherent dynamics of head domain correlates with ATP-recognition of P2X4 receptors: insights gained from molecular  
265 simulations. *PloS one* 9:e97528.
- 266 42. Pierdominici-Sottile, G., L. Moffatt, and J. Palma, 2016. The dynamic behavior of the P2X4 ion channel in the closed  
267 conformation. *Biophysical journal* 111:2642–2650.
- 268 43. Zhao, W. S., M. Y. Sun, L. F. Sun, Y. Liu, Y. Yang, L. D. Huang, Y. Z. Fan, X. Y. Cheng, P. Cao, Y. M. Hu, L. Li, Y. Tian,  
269 R. Wang, and Y. Yu, 2016. A highly conserved salt bridge stabilizes the kinked conformation of  $\beta$ 2,3-sheet essential for  
270 channel function of P2X4 receptors. *Journal of Biological Chemistry* 291:7990–8003.
- 271 44. Wang, J., L. F. Sun, W. W. Cui, W. S. Zhao, X. F. Ma, B. Li, Y. Liu, Y. Yang, Y. M. Hu, L. D. Huang, X. Y. Cheng, L. Li,  
272 X. Y. Lu, Y. Tian, and Y. Yu, 2017. Intersubunit physical couplings fostered by the left flipper domain facilitate channel  
273 opening of P2X4 receptors. *Journal of Biological Chemistry* 292:7619–7635. 1
- 274 45. Jo, S., T. Kim, and W. Im, 2007. Automated builder and database of protein/membrane complexes for molecular dynamics  
275 simulations. *PLoS One* 2:e880. 2.1
- 276 46. Lee, L. C., G. S. Kassab, and J. M. Guccione, 2016. Mathematical modeling of cardiac growth and remodeling. *Wiley*  
277 *Interdisciplinary Reviews: Systems Biology and Medicine* 8:211–226. 2.1
- 278 47. Jorgensen, W. L., J. Chandrasekhar, J. D. Madura, R. W. Impey, and M. L. Klein, 1983. Comparison of Simple Potential  
279 Functions for Simulating Liquid Water. *Journal of Chemical Physics* 79:926–935. 2.1
- 280 48. Case, D., T. Darden, T. E. Cheatham, C. Simmerling, J. Wang, R. E. Duke, R. Luo, R. C. Walker, W. Zhang, and K. M.  
281 Merz, 2012. Amber 12. *University of California: San Francisco, CA* . 2.1
- 282 49. Reid, J. K., 1971. On the Method of Conjugate Gradients for the Solution of Large Sparse Systems of Linear Equations. *In*  
283 J. K. Reid, editor, *Large Sparse Sets of Linear Equations*, Academic Press, London, 231–254. 2.1
- 284 50. Case, D., R. Betz, D. Cerutti, T. Cheatham, T. Darden, R. Duke, T. Giese, H. Gohlke, A. Götz, N. Homeyer, S. Izadi,  
285 P. Janowski, J. Kaus, A. Kovalenko, T.-S. Lee, S. LeGrand, P. Li, C. Lin, T. Luchko, and P. A. Kollman, 2016. Amber 16.  
286 *University of California: San Francisco, CA* . 2.1
- 287 51. Martyna, G. J., D. J. Tobias, and M. L. Klein, 1994. Constant pressure molecular dynamics algorithms. *Journal of*  
288 *Chemical Physics* 101:4177–4189. 2.1
- 289 52. Feller, S. E., Y. Zhang, R. W. Pastor, and B. R. Brooks, 1995. Constant pressure molecular dynamics simulation: The  
290 Langevin piston method. *Journal of Chemical Physics* 103:4613–4621. 2.1

- 291 53. Darden, T., D. York, and L. Pedersen, 1993. Particle mesh Ewald: An Nlog(N) method for Ewald sums in large systems.  
292 *The Journal of chemical physics* 98:10089–10092. 2.1
- 293 54. Ryckaert, J.-P., G. Ciccotti, and H. J. C. Berendsen, 1977. Numerical integration of the cartesian equations of motion of a  
294 system with constraints: molecular dynamics of n-alkanes. *Journal of Computational Physics* 23:327–341. 2.1
- 295 55. Humphrey, W., A. Dalke, and K. Schulten, 1996. VMD: visual molecular dynamics. *Journal of Molecular Graphics*  
296 14:33–38. 2.1
- 297 56. Hattori, M., and E. Gouaux, 2012. Molecular mechanism of ATP binding and ion channel activation in P2X receptors.  
298 *Nature* 485:207. 3, 3.1
- 299 57. Towns, J., T. Cockerill, M. Dahan, I. Foster, K. Gaither, A. Grimshaw, V. Hazlewood, S. Lathrop, D. Lifka, G. D. Peterson,  
300 R. Roskies, J. R. Scott, and N. Wilkens-Diehr, 2014. XSEDE: Accelerating Scientific Discovery. *Computing in Science &*  
301 *Engineering* 16:62–74. 6

## 302 7 SUPPLEMENTARY MATERIAL

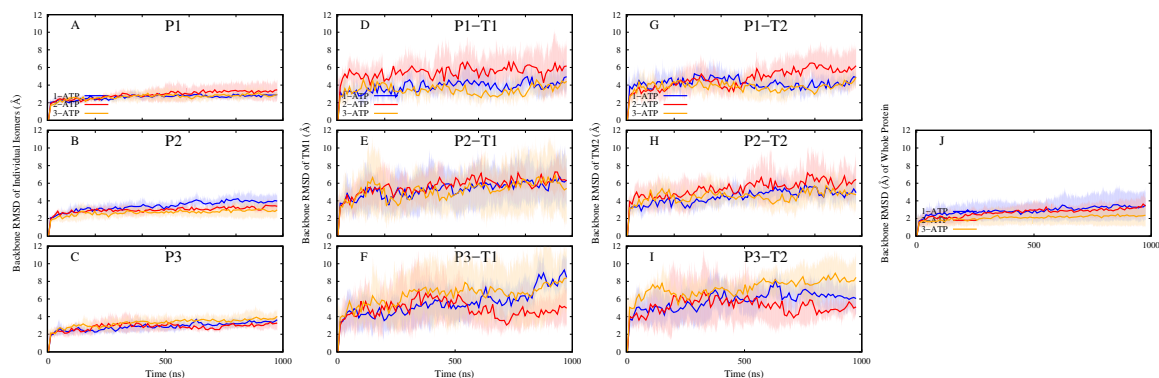

Figure S1: Backbone RMSD vs. Time. P1, P2 and P3 corresponds to the three isomers. TM1 and TM2 are transmembrane helices 1 and 2 of each isomer. **A-C** RMSDs of the three isomers. **D-F** RMSDs of TM1s of the three isomers. **G-I** RMSDs of TM2s of the three isomers. **J** RMSD of all three isomers of each zfp2X4 combined. Average of three MD trials of each system is shown and the error bars (i.e., standard deviation) are shaded.



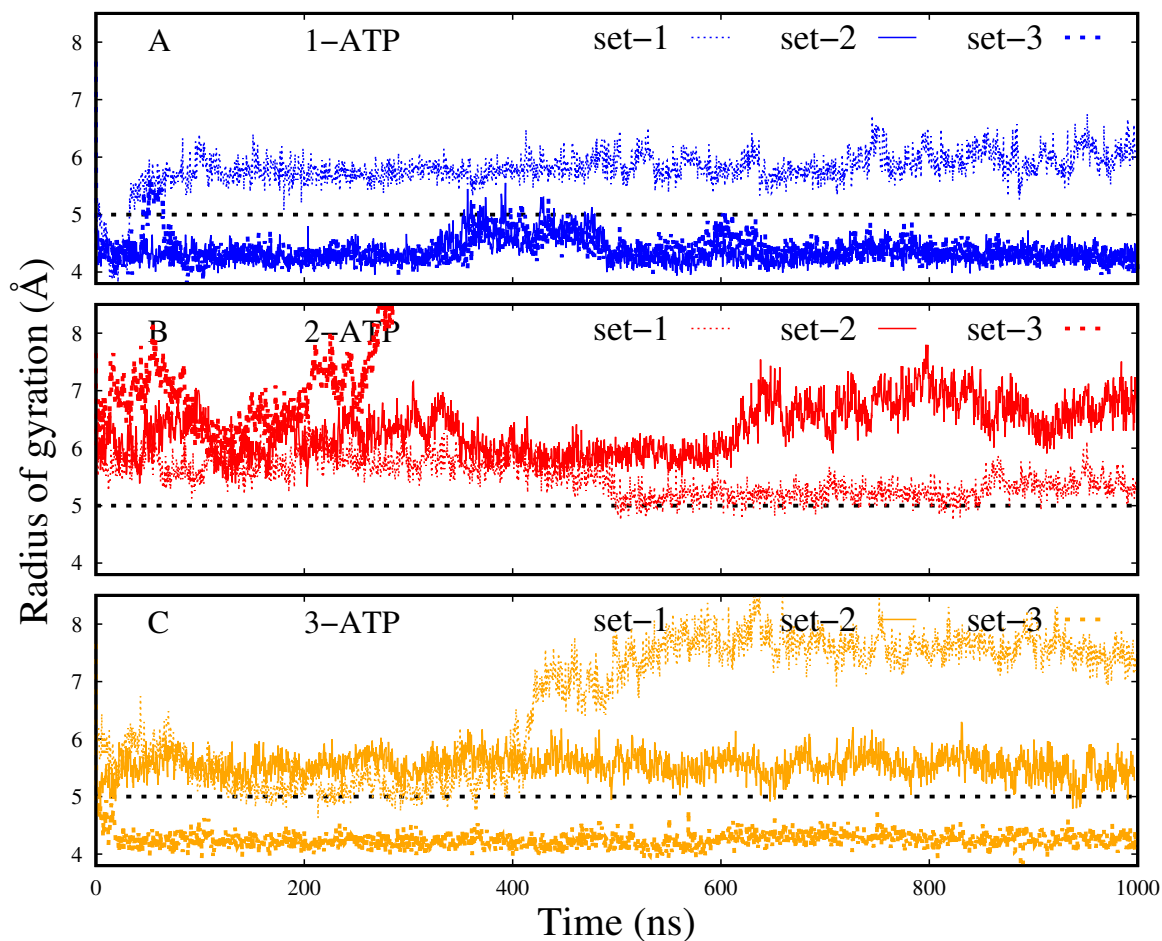

Figure S2: Radius of gyration vs. time. 1-, 2-, and 3-ATP systems are colored blue, red and orange, respectively. Dotted horizontal line at  $Y=5$  separates 1-ATP system with the other two systems.  $R_g$  of 1-ATP systems were less than  $5 \text{ \AA}$ , except for one outlier (set-1). On the other hand the  $R_g$  of 2- & 3-ATP systems are greater than  $5 \text{ \AA}$ , except for one outlier in the 3-ATP system (set-3).

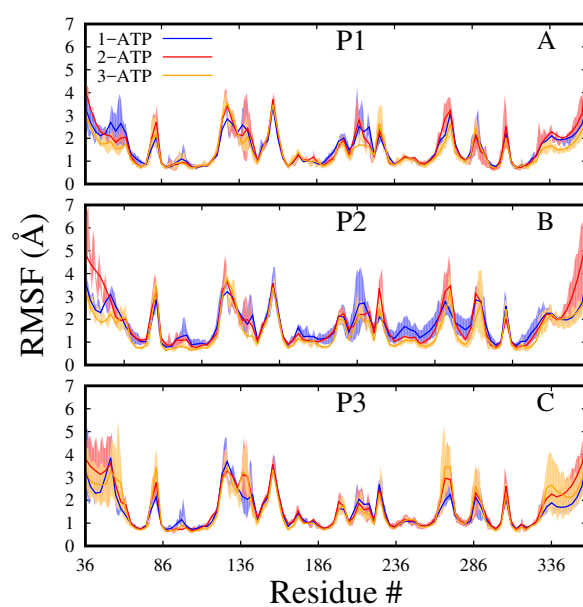

Figure S3: Root mean squared fluctuations (RMSF) vs. Residue Number. Only  $C_{\alpha}$  atoms are considered. P1, P2 and P3 refers to the individual isomers. P2 isomer of 1-ATP system is more dynamic than the other two, particularly residues 230-286. 1-, 2-, and 3-ATP systems are colored blue, red and orange, respectively. Average and standard of the three MD trials are shown.

303 **ACRONYMS**

304 **Ca<sup>2+</sup>** calcium. 1, 4

305 **Cl<sup>-</sup>** chloride. 3

306 **K<sup>+</sup>** potassium. 1, 3–6, 8

307 **MD** molecular dynamics. 1–4, 8, 14, 16

308 **Mg<sup>2+</sup>** magnesium. 1, 4, 6

309 **Na<sup>+</sup>** sodium. 4

310 **R<sub>g</sub>** radius of gyration. 5, 15

311 **RMSF** Root mean squared fluctuations. 16

312 **TMD** transmembrane domain. 2, 4

313 **zfP2X4** zebrafish P2X4. 1–6, 8, 14

314 **Zn<sup>2+</sup>** zinc. 5
